# Supplementary material for: Oxygen saturation targets in infants with bronchiolitis (BIDS): a double-blind, randomised, equivalence trial
Source: PubMed Central journal article supplement — Lancet. 2015 Sep 12;386(9998):1041–8. doi: 10.1016/S0140-6736(15)00163-4 (PMC4673090; doi:10.1016/s0140-6736(15)00163-4), 2015-09-12
Supplement: mmc1.pdf [file mmc1.pdf]

# THE LANCET

## Supplementary appendix

This appendix formed part of the original submission and has been peer reviewed. We post it as supplied by the authors.

Supplement to: Steve Cunningham, et al, for the Bronchiolitis of Infancy Discharge Study (BIDS) group. Oxygen saturation targets in infants with bronchiolitis (BIDS): a double-blind, randomised, equivalence trial. *Lancet* 2015; **386**: 1041–48.

Oxygen saturation targets in infants with bronchiolitis (BIDS); a double-blind, randomized, equivalence trial

Cunningham et al

Supplementary Data

## **Table of Contents**

Page

|   |                                                           |
|---|-----------------------------------------------------------|
| 2 | Additional Methods                                        |
| 3 | Figure A1                                                 |
| 4 | Tables A1- A7                                             |
| 8 | The Bronchiolitis of Infancy Discharge Study Group (BIDS) |
| 9 | References                                                |

## **Additional methods data**

### **Centres recruiting**

Recruitment was in five centres in season one (Aberdeen, Dundee, Edinburgh, Glasgow and Kilmarnock) with three additional centres added in season two (Bristol, Exeter, Truro). The distribution of standard and modified oximeters was similar within centres and between seasons.

### **Method for imputing missing data:**

Missing data: If a date of cough resolution was known, it was used. If it was known that the cough resolved, but the precise date was unknown, a random value was chosen between the date that the cough was last known to be present and the date of the follow up when it was found that the cough had stopped. The random value was chosen from infants in the same treatment group whose cough stopped in a similar time frame. If it was known that the cough had not resolved by 6 months, the date of cough was predicted by taking a random value from a uniform distribution capped from 180 days to 200 days (upper cap based on the observations by M. Shields<sup>1</sup>). If it was known that the cough had not stopped by the last follow up done, but the infant was not followed to 6 months, then a random value was chosen from a uniform distribution with the lower cap was pegged to the last known follow up time (i.e. 7, 14, 28 days) instead of 180 days. This process was repeated 100 times, and the analysis done on each dataset. The mean values for the estimate of the median, and the estimates of the CI limits were used. If 100 repetitions did not produce a stable estimate, then this number was to be increased, but this was not necessary.

### **Limits of Equivalence**

There is no published evidence to support the limit of equivalence for cough resolution. We therefore sampled the expert opinion of Ten Consultant Paediatricians who contribute to the General Paediatric Service at the Royal Hospital for Sick Children, Edinburgh (and who provide clinical management of infants with bronchiolitis). They were provided with information on the mean time to cough resolution (from Plint et al<sup>2</sup>) and asked, in open-ended unbiased manner (no prompts) to provide their expert opinion on the ranges around this value. A variance of +/- two days was thus identified. The same equivalence limit of two days in either direction was used for time back to normal. For time to return to satisfactory feeding we used a typical infant feed interval of four hours as equivalence.

**Figure A1** Adjusted algorithm for modified oximetry (true versus altered)

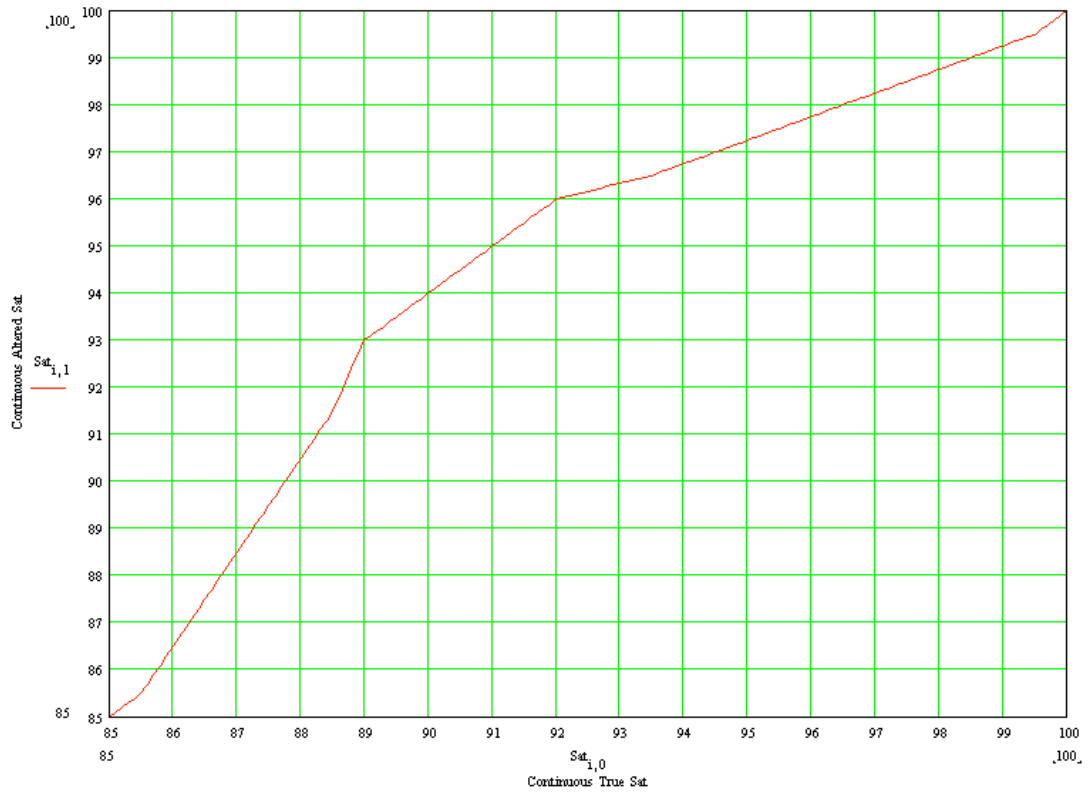

**Table A1****Table of primary outcome results for per protocol population**

|                                 | Standard group                | Modified group                | Median difference |
|---------------------------------|-------------------------------|-------------------------------|-------------------|
| Time to resolution cough (days) | 15.0 (10.0 to 43.0);<br>n=297 | 16.0 (10.0 to 44.0);<br>n=279 | 0.0 (-1 to 2)     |

**Table A2****Time to resolution of cough by subgroup analysis demonstrated no notable differences with wide confidence intervals**

| Subgroup analyses:                                                 | Standard<br>(median, IQR,<br>n) | Modified<br>(median, IQR,<br>n) | Median<br>Differen<br>ce | Upper and<br>Lower 95%<br>CI | All<br>(median,<br>IQR, n) |
|--------------------------------------------------------------------|---------------------------------|---------------------------------|--------------------------|------------------------------|----------------------------|
| Time to cough<br>resolution: smoking<br>household (days)           | 15.0<br>(10.0, 35.0)<br>n=129   | 13.0<br>(9.0, 34.0)<br>n=125    | 1.0                      | -2,3                         | 14.0<br>(10.0,35.0)        |
| non-smoking<br>household (days)                                    | 15.5<br>(10.0, 47.0)<br>n=166   | 16.0<br>(10.0, 44.0)<br>n=168   | 0                        | -2,2                         | 16.0<br>(10.0,45.0)        |
| Time to cough<br>resolution: onset<br>illness $\leq$ 3 days (days) | 13.0<br>(10.0, 32.0)<br>n=143   | 14.0<br>(10.0, 33.0)<br>n=134   | 0                        | -2,2                         | 14.0<br>(10.0,32.0)        |
| $\geq$ 4 days (days)                                               | 18.0<br>(10.0, 48.0)<br>n=153   | 16.0<br>(9.9, 44.0)<br>n=157    | 1.0                      | -1,3                         | 17.0<br>(10.0,47.0)        |
| Time to cough<br>resolution: antibiotics<br>yes                    | 12.0<br>(9.0,65.0)<br>n=57      | 15.0<br>(10.0,43.0)<br>n=52     | 0                        | -4,5                         | 13.0<br>(10.0,55.0)        |
| Antibiotics no                                                     | 16.0<br>(10.0,39.0)<br>n=239    | 15.0<br>(9.0,40.0)<br>n=241     | 1                        | -1,2                         | 15.5<br>(10.0,39.5)        |

**Table A3 : Adverse Events (AE are reported on ITT allocation)**

**(a) Adverse Events: Number of events by severity**

| Parameter                                  | Category | Standard pulse oximeter (N=308) | Modified pulse oximeter (N=307) |
|--------------------------------------------|----------|---------------------------------|---------------------------------|
| Number of AEs                              | Overall  | 89                              | 84                              |
| Number of respiratory AEs by severity      | Mild     | 28                              | 25                              |
|                                            | Moderate | 17                              | 20                              |
|                                            | Severe   | 7                               | 9                               |
| Number of gastrointestinal AEs by severity | Mild     | 7                               | 8                               |
|                                            | Moderate | 0                               | 5                               |
|                                            | Severe   | 0                               | 0                               |
| Number of other AEs by severity            | Mild     | 19                              | 12                              |
|                                            | Moderate | 8                               | 2                               |
|                                            | Severe   | 2                               | 0                               |

**(b) Adverse Events by category (>3 events). Each SAE had a corresponding AE.**

|                                  | Standard | Modified |
|----------------------------------|----------|----------|
| Total Events (number of infants) | 89 (87)  | 84 (81)  |
| Increased chesty/bronchiolitis   | 25 (25)  | 23 (23)  |
| Cough                            | 16 (15)  | 21 (20)  |
| Wheeze                           | 4 (4)    | 3 (3)    |
| Pyrexia                          | 5 (5)    | 2 (2)    |
| Ear Infection                    | 8 (8)    | 3 (3)    |
| Decreased feeding                | 4 (4)    | 4 (4)    |
| Diarrhoea and/or vomiting        | 4 (4)    | 10 (9)   |
| Eye Infection                    | 3 (2)    | 3 (3)    |
| Eczema/rash/dry skin             | 4 (4)    | 1 (1)    |
| Other Respiratory                | 7 (7)    | 8 (8)    |
| Other                            | 9 (9)    | 6 (6)    |

**Table A4 Additional Therapies in Hospital**

|                                 | Standard             | Modified             | All                  |
|---------------------------------|----------------------|----------------------|----------------------|
| Need for supplemental oxygen    | 223 (73.1%)<br>n=305 | 169 (55.6%)<br>n=304 | 392 (64.4%)<br>n=609 |
| Use of nasogastric tube feeding | 141 (46.2%)<br>n=305 | 125 (41.3)<br>n=303  | 266 (43.8)<br>n=608  |
| Use of intravenous fluids       | 29 (9.5%)<br>n= 305  | 28 (9.2%)<br>n= 304  | 57 (9.4%)<br>n=609   |
| Use of antibiotics              | 44 (14.4%)<br>n=305  | 39 (12.8%)<br>n=304  | 83 (13.6%)<br>n=609  |
| Use of Salbutamol               | 25 (8.2%)<br>n=305   | 21 (6.9%)<br>n=304   | 46 (7.6%)<br>n=609   |

**Table A5 Parent Anxiety Scores**

|                            | Standard<br>(median,<br>iqr) | Modified<br>(median, iqr) | All<br>(median,<br>iqr) | Mean<br>Difference<br>(95% CI) | p    |
|----------------------------|------------------------------|---------------------------|-------------------------|--------------------------------|------|
| Anxiety Score at admission | 7 (4,10)<br>n=298            | 7 (4,11)<br>n=298         | 7 (4,11)<br>n=596       |                                |      |
| Anxiety Score 7 days       | 4 (2,8)<br>n=266             | 4 (2,7)<br>n=265          | 4 (2,7)<br>n=531        | -0.18<br>(-0.75,0.39)          | 0.53 |
| Anxiety Score 14 days      | 3 (1,6)<br>n=256             | 3 (1,5)<br>n=252          | 3 (1,5)<br>n=508        | 0.00<br>(-0.57,+0.56)          | 0.99 |
| Anxiety Score 28 days      | 3 (1,7)<br>n=259             | 3 (1,6)<br>n=252          | 3 (1,6)<br>n=511        | -0.27<br>(-0.88,0.34)          | 0.39 |

**Table A6**      **Lead carer loss of hours to usual activities**

|                                                      | Standard                    | Modified                   | All                        |
|------------------------------------------------------|-----------------------------|----------------------------|----------------------------|
| Lead carer (=mother)                                 | 288 (95.4%)<br>n=304        | 283 (93.4%)<br>n=303       | 571 (94.4%)<br>n=607       |
| Lead carer hours missed days 0-7 days (median, iqr)  | 58.3 (25.1, 96.5)<br>n=304  | 44.8 (24.6, 72.0)<br>n=302 | 49.3 (24.8, 85.5)<br>n=606 |
| Lead carer hours missed days 0-14 days (median, iqr) | 62.3 (25.7, 97.3)<br>n=304  | 45.0 (25.3, 72.7)<br>n=303 | 50.9 (25.6, 85.5)<br>n=607 |
| Lead carer hours missed days 0-28 days (median, iqr) | 63.4 (27.5, 101.2)<br>n=304 | 47.3 (25.7, 76.4)<br>n=303 | 53.4 (26.3, 89.3)<br>n=607 |

**Table A7**      **Number (%) of infant return to childcare**

|                                                  | Standard            | Modified            | All                  |
|--------------------------------------------------|---------------------|---------------------|----------------------|
| Attending childcare at time of randomisation     | 58 (19.1%)<br>n=303 | 41 (13.6%)<br>n=301 | 99 (16.4%)<br>n=604  |
| Well enough to attend childcare from 0 -7 days   | 24 (48.0%)<br>n=50  | 18 (52.9%)<br>n =34 | 42 (50.0%)<br>n=84   |
| Well enough to attend childcare from 7 -14 days  | 28 (54.9%)<br>n=51  | 22 (62.9%)<br>n =35 | 50 (58.1%)<br>n =86  |
| Well enough to attend childcare from 14 -28 days | 35 (68.6%)<br>n =51 | 19 (57.6%)<br>n =33 | 54 (64.3%)<br>n = 84 |



## **The Bronchiolitis of Infancy Discharge Study (BIDS) Group**

### **Trial Steering Committee**

Dr Clare Murray\* (Independent Clinician), Senior Lecturer and Paediatric Respiratory Consultant, University of Manchester.

Dr Colin Powell\* (Independent Clinician), Senior Lecturer in Child Health and Honorary Consultant Paediatrician, University of Cardiff.

Professor Mike Shields\* (Chair), Professor of Child Health, Queen's University Belfast.

### **Data Monitoring Committee**

Professor Carrol Gamble\* (DMC Statistician), Professor of Medical Statistics, University of Liverpool.

Dr Mike McKean\* (Independent Member), Consultant in Respiratory Paediatrics, Newcastle upon Tyne Hospitals.

Dr Sheila McKenzie\* (Chair), Retired Consultant in Paediatric Respiratory Medicine. Current Community Paediatrician, NHS Highland.

### **Data Management Group**

Dr Kathleen A Boyd, Isabella Butcher, Dr Steve Cunningham, Professor Steff C Lewis, Dr Morag MacLean, Dr Emma McIntosh, Aryelly Rodriguez, Dr Sharon Tonner, Fiona Wee (née Sloan).

### **Economic evaluation**

Dr Kathleen A Boyd, Dr Emma McIntosh.

### **Recruiting centres**

[collaborating doctors and nurses (\*the principal investigators listed first)]

**Royal Aberdeen Children's Hospital, Aberdeen:** Dr Steve Turner,\* Lindsay Cameron, Donna Nelson, Jill Paxton, Victoria Thomson.

**Bristol Royal Hospital for Children, Bristol:** Dr Huw Thomas,\* Tracey Bingham, Helen Clark, Laura Clifford, Dr Mark Lyttle, Alice Parham, Sarah Potter (previously Jelly), Nicola Robinson, Hannah Spires.

**Tayside Children's Hospital, Dundee:** Dr Jonathan McCormick,\* Susan MacFarlane, Fiona Treanor.

**Royal Hospital for Sick Children, Edinburgh:** Dr Steve Cunningham\*, Emma Carson, Vikki Gould, Debbie Miller, Orla Duncan, Kay Riding.

**Royal Devon and Exeter Hospital, Exeter:** Dr Beth Enderby,\* Caroline Harrill, Suzanne Wilkins.

**Royal Hospital for Sick Children, Yorkhill, Glasgow:** Dr James Paton\*, Dr Jack Beattie,\* Dr Claire Milne, Elizabeth Waxman.

**University Hospital Crosshouse, Kilmarnock:** Dr Tim Adams,\* Claire Bell, Margo Henry.

**Royal Cornwall Hospital, Truro:** Dr Chris Williams,\* Dr Anne Prendiville, Gill Craig, Hannah Solomon, Nina Worrin.

### **Database programming and data management**

Ronald Harkness, Samantha Thomas, Allan Walker.

## References

1. Shields MD, Thavagnanam S. The difficult coughing child: prolonged acute cough in children. *Cough* 2013; **9**(1): 11.
2. Plint AC, Johnson DW, Patel H, et al. Epinephrine and dexamethasone in children with bronchiolitis. *N Engl J Med* 2009; **360**(20): 2079-89.
